# Supplementary material for: Twenty‐Four‐Hour Urinary Aldosterone Predicts Inappropriate Left Ventricular Mass Index in Patients with Primary Aldosteronism
Source: Hindawi journal article supplement (doi:10.1155/2013/294594), 2013-01-01
Supplement: f1 [file 294594.f1.pdf]

Supplementary Table 1: The correlation of urine aldosterone level and LV wall thickness, dimension and LA size in Group 1 only and in Group 2 and 3

| ***Group 1            | LVMI    | Measure to<br>predicted<br>LVMI ratio¶ | excess<br>LVMI | LV<br>mass | IVS    | PW      | LVEDD  | LVESD  | RWT    | LA      |
|-----------------------|---------|----------------------------------------|----------------|------------|--------|---------|--------|--------|--------|---------|
| Urine<br>Aldosterone* | 0.428*  | 0.345*                                 | 0.386*         | 0.477*     | 0.480* | 0.392*  | 0.176  | 0.119  | -0.289 | 0.277   |
| PAC*                  | -0.014  | -0.037                                 | -0.042         | 0.048      | -0.032 | 0.070   | 0.045  | 0.148  | -0.027 | 0.190   |
| PRA*                  | -0.087  | -0.083                                 | -0.073         | -0.002     | -0.073 | 0.049   | 0.026  | 0.079  | -0.274 | -0.348  |
| ARR*                  | 0.011   | -0.026                                 | -0.048         | -0.008     | -0.126 | -0.282  | 0.231  | 0.367* | -0.476 | 0.201   |
| Group 1, 2, 3         | LVMI    | Measure to<br>predicted<br>LVMI ratio¶ | excess<br>LVMI | LV<br>mass | IVS    | PW      | LVEDD  | LVESD  | RWT    | LA      |
| Urine<br>Aldosterone  | 0.359*  | 0.350*                                 | 0.369*         | 0.363*     | 0.373* | 0.395*  | 0.152  | 0.100  | 0.165  | 0.325*  |
| PAC                   | 0.143   | 0.224*                                 | 0.207*         | 0.148      | 0.170* | 0.259*  | -0.023 | 0.061  | 0.008  | 0.264*  |
| PRA                   | -0.197* | -0.223*                                | -0.223*        | -0.110     | -0.162 | -0.185* | 0.054  | -0.006 | -0.231 | -0.298* |
| ARR                   | 0.223*  | 0.293*                                 | 0.286*         | 0.172*     | 0.197* | 0.265*  | -0.013 | 0.110  | 0.196* | 0.325*  |

Supplementary Table 2: predictors for LVMI or inappropriate LVMI in Group 1 only or Group 2 and 3

| †Group 1                                |                      |       |
|-----------------------------------------|----------------------|-------|
| A. LVMI as the dependent factor         |                      |       |
| Independent variables                   | B (95% CI)           | P     |
| Urine aldosterone                       | 81.9(26.6-137.2)     | 0.005 |
| K                                       | -37.6(-61.8- -13.4)  | 0.004 |
| SBP                                     | 0.569(0.142-0.997)   | 0.011 |
| B. excess LVMI¶ as the dependent factor |                      |       |
| Independent variables                   | B (95% CI)           | P     |
| Urine aldosterone                       | 68.32(12.4-124.2)    | 0.019 |
| K                                       | -37.9(-63.2 - -12.6) | 0.005 |
| †Groups 2, 3                            |                      |       |
| A. LVMI as the dependent factor         |                      |       |
| Independent variables                   | B (95% CI)           | P     |
| Urine aldosterone                       | 29.3(3.2-55.4)       | 0.025 |
| K                                       | -12.78 (-24.8—0.7)   | 0.037 |
| B. excess LVMI¶ as the dependent factor |                      |       |
| Independent variables                   | B (95% CI)           | P     |
| Urine aldosterone*                      | 29.2(7.2-51.1)       | 0.01  |

¶excess LVMI = measured LVMI – predicted LVMI
